# Supplementary material for: Exposing drug industry funding of UK patient organisations
Source: PubMed Central journal article supplement — BMJ. 2019 May 22;365:l1806. doi: 10.1136/bmj.l1806 (PMC6529850; doi:10.1136/bmj.l1806), 2019-05-22
Supplement: ozip046246.ww1.pdf [file ozip046246.ww1.pdf]

## Search strategy – Drug company payment disclosure reports

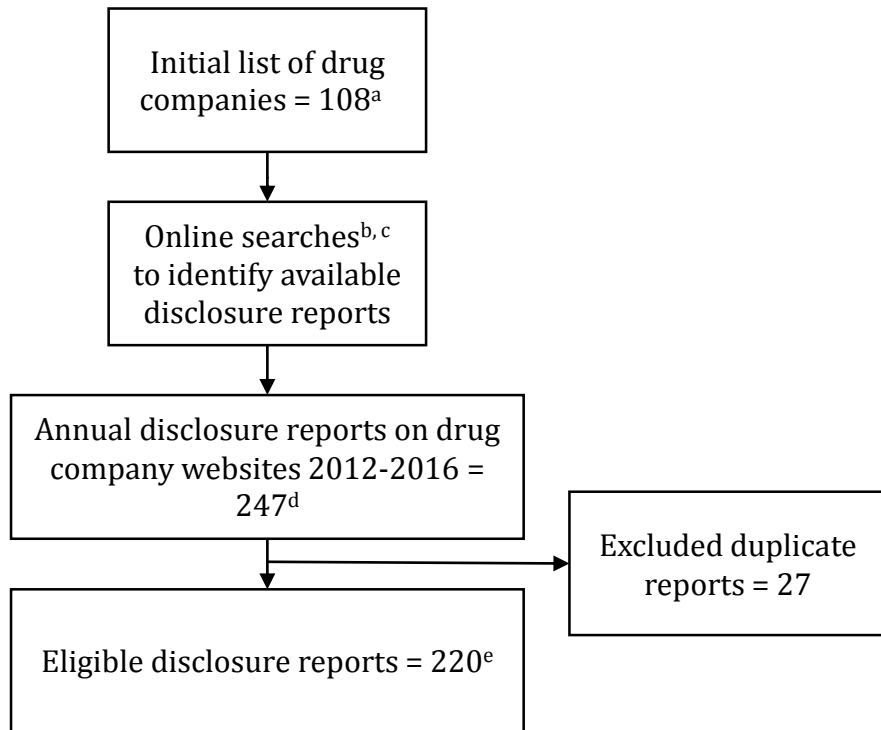

### Note.

<sup>a</sup> Inclusion criterion: Followed ABPI Code of Conduct in relation to disclosing payments to healthcare professionals and healthcare organisations in 2015. The criterion was met if a company published its “methodological notes” on the Disclosure UK website in 2016. The publication of the methodological notes meant that a company actively sought to disclose its payments and therefore met the provisions of the Code of Conduct.

<sup>b</sup> Google search engine using search terms: “[Drug company name]” AND “patient organisation/patient organization/patient group”.

<sup>c</sup> Supplementary searches on the websites of companies were conducted when no results were returned using Google to ensure nothing relevant was missed.

<sup>d</sup> Inclusion criteria: 1) **year covered by a report** (2012, 2013, 2014, 2015, or 2016); 2) if a company published more than one disclosure report in a given year (UK and EU/global), **the report type** (either UK or EU/global) with the longest time series for the UK was included in analysis.

<sup>e</sup> Reports by year: 2012=30, 2013=43, 2014=47, 2015=54, 2016=46
