# Supplementary material for: Exposing drug industry funding of UK patient organisations
Source: PubMed Central journal article supplement — BMJ. 2019 May 22;365:l1806. doi: 10.1136/bmj.l1806 (PMC6529850; doi:10.1136/bmj.l1806), 2019-05-22
Supplement: ozip046246.ww2.pdf [file ozip046246.ww2.pdf]

Disclosure reports published by ABPI and non-ABPI members (2012-2016)

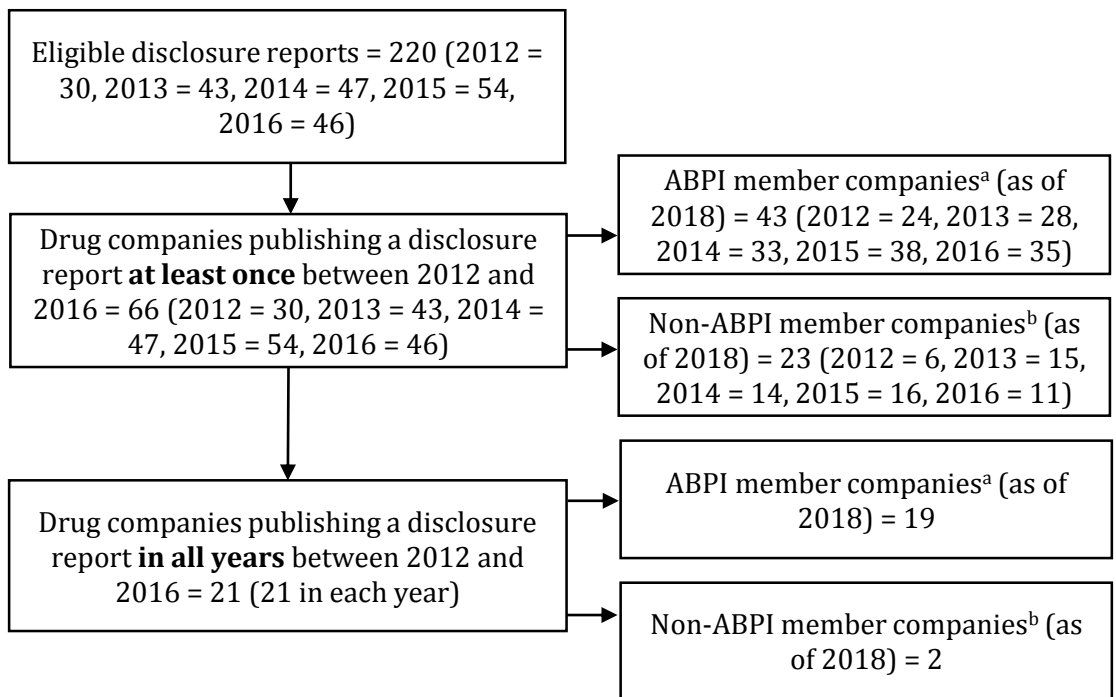

*Note.*

<sup>a</sup> Inclusion criterion: Member of ABPI in 2018.

<sup>b</sup> Inclusion criterion: Not a member of ABPI in 2018
